# Supplementary material
Source: PubMed Central journal article supplement (PMC3932923)
Supplement: 1316539111_pnas.201316539SI.pdf [file 1316539111_pnas.201316539SI.pdf]

# Supporting Information

Rodriguez-Garcia et al. 10.1073/pnas.1316539111

## SI Materials and Methods

**Gene Construction.** Wild-type apo-aequorin gene was amplified by PCR using the following primers: forward 5'-ttggtaccGG-TAAACTTACATCAGACTTC-3', (*KpnI* site is underlined); reversed 5'-ccgaattcTTAGGGGACAGCTCCACCG-3' (*EcoRI* site is underlined). The product was digested with *KpnI* and *EcoRI* and cloned into a pcDNA3 vector cleaved with *KpnI* and *EcoRI*. Next, the GFPuv gene was amplified by PCR from the vector pBAD-GFPuv (Clontech) with the following primers: forward 5'-ccaagcttGCCACCATGGCTAGCAAAGGA-3' (*HindIII* site is underlined) and reversed 5'-ttggtaccCGTTTGTAGAGCTCAT-3' (*KpnI* site is underlined) in which the final Stop codon was removed and fused in frame with apoaequorin in the *KpnI* site. Finally, complementary oligonucleotides 5'-AGCGACCCCAG-CAACCACGCCGACCACTGCACCGACCGCGGGTAC-3' and 5'-CCGCGGTTCGGTGCAGTGGTTCGGCGTGGTTGCTGGG-GTCGCTGTAC-3' which codify for the TATPATTPTTAPT-AGT linker were inserted at the *KpnI* site between GFP and aequorin. All mutations were introduced into GAP (GFP-Aequorin protein) by site-directed mutagenesis using the QuikChange Site-directed mutagenesis kit (Stratagene).

To express the genes in bacteria, GAP and GAP1 were amplified by PCR and cloned in frame into the *EcoRI* site of the pET28A plasmid. The different organelle-targeted GAP constructs were generated by in-frame fusion of the *HindIII-HindIII* fragments of either the *Xenopus* nucleoplasm (nucleus), luciferase (cytosol), or the 34 first residues of cytochrome *c* oxidase VIII (mitochondria) to the 5'-end of GAP cDNA (1). GAP was targeted to ER by adding the calreticulin signal peptide and the sequence encoding the ER retention KDEL to the 5'- and 3'-end of GAP, respectively (2). Targeting to the Golgi apparatus was made by fusing the 5'-end of GAP1 to the N-terminal 81 amino acids of the galactosyltransferase (3). erGAP1 was subcloned into the pCAG-GS vector with a CAG promoter (CMV enhancer,  $\beta$ -actin promoter) and regulatory elements from the woodchuck hepatitis virus (WPRE) for making transgenic mice. The integrity of all constructs was verified by sequencing.

**Protein Purification and  $Ca^{2+}$  Calibration.** The plasmids pET28A-GAP or pET28A-GAP1 were transformed in *Escherichia coli* BL21 (Stratagene). For protein expression, bacteria were grown at 37° to  $A_{600}$  of >0.6 in LB containing 40 mg/L kanamycin, then induced with 0.5 mM isopropyl  $\beta$ -D-thiogalactoside for 6 h at 25°. The cells were then pelleted by centrifugation and sonicated in a buffer containing (in mM): NaCl, 250; EDTA, 5; PMSF, 0.5; DTT, 2; Tris-HCl, 50, pH 8.8. The bacterial lysate was centrifuged at 30,000 g for 15 min. Most of the protein was present in the inclusion bodies as an insoluble material which could be solubilized in 8 M urea, 5 mM DTT, 50 mM Tris-HCl, pH 8.8, by rocking at 4° overnight. The insoluble protein was removed by centrifugation at 30,000  $\times$  g for 15 min, and the supernatant was subjected to dialysis against 50 mM Tris-HCl buffer, pH 8.8 for 8 h. Then, 5 mM DTT was added. The protein was further purified with Ni<sup>2+</sup>-Sephacel beads (GE Healthcare) following the manufacturer's protocol and eluted with 500 mM imidazole.

Fluorescence spectra were measured without  $Ca^{2+}$  (0.1 mM EGTA) and with excess (1 mM)  $Ca^{2+}$  in a solution containing 140 mM KCl, 1 mM MgCl<sub>2</sub>, and 20 mM MOPS/Tris, pH 7.2.

Calcium calibrations of GAP were performed using a Tecan Genios Pro Basic 96-well plate reader. GAP protein (3  $\mu$ g) was added to each well containing 200  $\mu$ L of 140 mM KCl, 1 mM MgCl<sub>2</sub>, and 20 mM MOPS/Tris, pH 7.2 and various buffered  $Ca^{2+}$  concentrations (4, 5) (see figure legends for details) and either

X-Rhod-5F ( $K_d = 1.6 \mu$ M) or Rhod FF ( $K_d = 17 \mu$ M). Traces of  $Ca^{2+}$  in the solutions were removed by pretreatment with Chelex resin (Bio-Rad; before  $Mg^{2+}$  addition) followed by Calcium Sponge (Molecular Probes). GAP fluorescence was measured in triplicates using the 390 and 485 excitation filters and 535-nm emission filter, and the values were used to calculate the  $F_{485}/F_{390}$  ratio (very similar to the  $F_{470}/F_{403}$  measured in the spectrofluorimeter). The Rhod fluorescence was measured simultaneously in the red channel (Ex: 535; Em: 590). Titration curves were obtained by fitting the data to a sigmoidal curve.

**Cell Culture and Expression in Mammalian Cells.** HeLa and HEK293 cells were maintained in DMEM (Invitrogen) supplemented with 10% (vol/vol) FBS, 2 mM L-glutamine, 100  $\mu$ g/mL streptomycin, and 100 U/mL penicillin. For imaging experiments,  $3 \times 10^4$  cells were seeded on poly-L-lysine-coated 12-mm-diameter coverslips and transfected with 0.1–0.5  $\mu$ g of the adequate pcDNA3 GAP variant using lipofectamine 2000 (Invitrogen). For mitochondria colocalization analysis, mitGAP was cotransfected together with pDsRed2-mito (Clontech) (1:1 mix of DNA with the GAP plasmid). Stable HeLa clones expressing erGAP1 or goGAP1 were obtained by electroporation or lipofectamine transfection, respectively. In the case of goGAP1, the population of GFP-positive cells was enriched by several rounds of cell sorting. Single-cell clones were selected in culture medium containing 0.8 mg/mL G-418 by limited dilution and maintained in 0.1 mg/mL G-418.

**Immunofluorescence.** SERCA2 immunofluorescence was performed by using a monoclonal anti-Serca IID8 antibody (1:200; Santa Cruz). Mouse motor neurons were identified by staining with a monoclonal anti-SMI-32 antibody (1:200, Abcam). Trans-Golgi network (TGN) was selectively stained with an anti-TGN64 antibody (1:200, AbD Serotec). As secondary antibodies, Alexa Fluor 568-conjugated anti-mouse and anti-sheep antibodies were used. Nuclei were stained with DAPI. For ER colocalization studies, living HeLa cells were incubated with 400 nM ER-Tracker (Molecular Probes) for 30 min in culture medium at 37 °C, and then fixed with 4% paraformaldehyde. Cells were mounted with Vectashield<sup>R</sup> (Vector) and observed with an Achromplan 20 $\times$  water-immersion objective, an EC-Plan-Neofluor 40 $\times$ , or a C-Apochromat 63 $\times$  water-immersion objective (NA, 1.20) in a Zeiss Axioplan Z microscope. Green (Ex, 470/40; Em, 540/50 nm), red (Ex, 560/40; Em, 605/50 nm), or blue (Ex, 390/22 nm; Em, 460/50 nm) fluorescence were imaged in fixed cells. The Zeiss ApoTome system was used for optical sectioning.

**Primary Neuronal Cultures.** Animal procedures were approved by the Valladolid Medical School Animal Ethics Committee. Dorsal root ganglion (DRG) neurons were isolated from neonatal (P0–P5) mice as described previously (6). Briefly, ganglia were removed in  $Ca^{2+}/Mg^{2+}$ -free HBSS at 4 °C and digested with trypsin-EDTA (0.25%, Gibco) and DNase (0.1 mg/mL) for 20 min at 37 °C. Neurons were dissociated from digested ganglia by manual trituration and resuspended in Neurobasal-A medium (Invitrogen) supplemented with 1% B-27 (Invitrogen), 0.5 mM glutamax, 50 ng/mL NGF, 100  $\mu$ g/mL streptomycin, and 100 U/mL penicillin and plated on 12-mm-diameter glass coverslips coated with laminin (10  $\mu$ g/mL) and poly-D-Lysine (100  $\mu$ g/mL) at a density of 30,000 cells/coverslip. The experiments were performed after 6–8 d in vitro.

Motor neurons cultures were prepared from E12–13 mice embryos as described previously (7). Briefly, cells were dissoci-

ated mechanically from the ventral horns of the spinal cords after trypsin (0.025%) treatment. The largest cells were isolated by iodixanol density gradient centrifugation. The  $3 \times 10^4$  motor neurons were plated onto poly-ornithine-laminin-coated 12-mm glass coverslips in Neurobasal-A medium supplemented with 2% horse serum, 1% B-27, 0.05 mM L-glutamine, 25  $\mu$ M  $\beta$ -mercaptoethanol, and neurotrophic factors [1 ng/mL BDNF, 10 ng/mL glial cell-derived neurotrophic factor (GDNF), 10 ng/mL hepatocyte growth factor (HGF), 10 ng/mL cardiotrophin-1 (CT-1), and 10 ng/mL ciliary neurotrophic factor (CNTF)].

Hippocampal neurons were isolated from P0-3 mice. Hippocampi were dissected in cold HBSS and digested with papain (0.5 mg/mL) and DNase (0.04 mg/mL) dissolved in a  $\text{Ca}^{2+}$ - and  $\text{Mg}^{2+}$ -free HBSS containing 1 mg/mL BSA and 10 mM glucose at 37 °C for 30 min. The papain solution was replaced with 1 mL of Neurobasal-A medium supplemented with 2% B-27, 2 mM glutamax, 100  $\mu$ g/mL streptomycin, and 100 U/mL penicillin, and 10% FBS. Cells were seeded onto poly-DL-lysine-coated 12-mm-diameter glass coverslips (30,000 cells/coverslip) at a final density of 1000 cells/mm<sup>2</sup> in the center of the coverslip. The cells were maintained in the medium described above containing 2.5% FBS for 1 wk before recordings.

**Virus Production.** erGAP1 cDNA was cleaved from pcDNA3 as a HindIII/EcoRI fragment and cloned into the Herpes Simplex Virus pHSVpUC plasmid. Packaging and titration were performed as earlier reported (1, 4). The  $3\text{--}5 \times 10^4$  neurons (DRG, hippocampal, or motor neurons) were infected with a multiplicity of infection (moi) ranging between 0.01 and 0.1. Neurons were used for imaging 24–48 h later.

**Ca<sup>2+</sup> Imaging.** Fluorescence was imaged on a Nikon Diaphot inverted microscope using a 20 $\times$  PlanApoUV (NA, 0.7) objective (Olympus). Test solutions were applied by perfusion at 2–3 mL/min. GAP was monitored using the two excitation filters, 403/12 DF and 470/25 DF and a 400-nM dichroic mirror. Cells were alternately epi-illuminated at 403 and 470 nm, and light emitted above 520 nm was recorded using a Hamamatsu C4742-98 camera handled by the Simple PCI 6.6 Hamamatsu software. For imaging GAP in combination with fura-2 ( $[\text{Ca}^{2+}]_c$ ) the cells were first incubated with fura-2-acetoxymethyl ester (2–4  $\mu$ M, Molecular Probes) for 60 min at 22 °C. Then, cells were excited sequentially with 340/10, 380/10, and 470/25 excitation filters, and fluorescence was read at >520 nm, as above. At 380 nm the interference of GAP signal with fura-2 fluorescence was estimated to be less than 10%, and fura-2 did not interfere with the GAP fluorescence excited at 470 nm. Output was background-subtracted and ratioed pixel-to-pixel using Image J software. The ratio  $F_{340}/F_{380}$  was used as an index of  $[\text{Ca}^{2+}]_c$  and  $F_{470}$  as an index of  $[\text{Ca}^{2+}]_{ER}$ .

The in situ calibration of GAP1 was performed in the erGAP1–HeLa clone permeabilized by a 1-min treatment with 60  $\mu$ M digitonin. The following ionophores were added to the internal medium used for calibration to assure complete collapse of ionic gradients: 10  $\mu$ M nigericin, 20  $\mu$ M monensin, 10  $\mu$ M 4-BrA23187, 1  $\mu$ M gramicidin, and 2  $\mu$ M CCCP. Internal-like medium had the following composition (in mM): MOPS–Na, 20; KCl, 140;  $\text{MgCl}_2$ , 1; pH 7.2. To avoid calcium contaminations, the medium was first run through a Chelex column to remove divalent cations, and then, after addition of  $\text{Mg}^{2+}$ , through a calcium sponge column (Molecular Probes) to remove calcium traces. The final medium contained 1 mM  $\text{MgCl}_2$  and either 0.1 mM EGTA ( $\text{Ca}^{2+}$ -free medium), nominally  $\text{Ca}^{2+}$ -free internal medium or solutions containing increasing  $\text{Ca}^{2+}$  concentrations (5–1000  $\mu$ M).  $\text{Ca}^{2+}$  concentrations in the range 1–100  $\mu$ M were made by blending

titrated solutions containing hydroxyethylenediaminetriacetic acid (HEDTA) and  $\text{CaCl}_2$  in the required amounts, calculated using the program MaxChelator (5). Great care was taken to maintain constant pH and  $[\text{Mg}^{2+}]$ .

Experiments to compare D1ER and erGAP1 were performed in lipofectamine-transfected HeLa cells or hippocampal neurons. Fluorescence was imaged on a Zeiss Axiovert 200M inverted microscope using a 20 $\times$  Plan-Apochromat Zeiss objective (NA, 0.8). D1ER was excited at 436 nm reflected by a 450-nm dichroic mirror, and emission was recorded at 470 and 520 nm. erGAP1 was excited at 405 and 485 nm (530-nm emission).

**Generation of Transgenic Mice.** The erGAP1 fragment containing the calreticulin/KDEL signal peptides and the mutations D117A, D119A, and D163A was cloned into the pCAG-GS vector (CMV enhancer,  $\beta$ -actin promoter, and regulatory element from the WPRE), obtained from L. Looger (Howard Hughes Medical Institute, Ashburn, VA). The 5-kb transgene was excised with *SspI/BsaBI*, gel-purified, and injected into B6CBAF2 oocytes using standard techniques. Thirty mice were screened for GAP sequences by routine PCR of genomic DNA obtained from tail biopsies using the primers #50 (forward, 5'-GATGGATCCG-TTCAACTAGCAGACC-3') and #201 (reverse, 5'-GTACCCG-CGGTCCGTGCAGTGGTC-3'). The specific PCR product had 255 bp. We found 12 transgenic founders for which we analyzed the copy number of the transgene by quantitative-PCR (Q-PCR) with the same primers as for routine PCR, using 20 ng of mouse genomic DNA and SYBRGreen. As housekeeping gene we used the mGAPDH, whose 274-pb product was amplified with the following primers: forward: 5'-TCCTGCACCACCACTGCTT; reversed: 5'-GTGGCAGTGTGGCATGGAC. We selected transgenic founders with high copy numbers of the transgene and crossed them with wild-type C57BL6 mice. Among them, we focused on three lines (L11, L20, L30) with erGAP1 expression in neural tissues, and all of the experiments were done in these lines.

**Histology.** Animals were anesthetized and fixed by intracardiac perfusion with 4% paraformaldehyde at 4 °C. Tissues were cryoprotected in 30% sucrose overnight, embedded in Tissue-Tek optimum cutting temperature (O.C.T) (Sakura) before cutting them in 30- $\mu$ m sections using a microtome (Leica). Images were taken with a Nikon Eclipse 80i microscope using Nikon PlanApo 4  $\times$  0.2 and 20  $\times$  0.75 objectives with a 450–490 excitation filter.

**Calcium Imaging of Hippocampal Slices.** Acute hippocampal slices were prepared (8) from 2-to-4-wk-old transgenic mice (lines L11, L20, or L30). The hippocampus was dissected out along with the cortex and sliced into 350–400- $\mu$ m-thick sections with a McIlwain Tissue Chopper. Slices were quickly transferred to a fine-meshed membrane filter and maintained in artificial cerebrospinal fluid (ACSF) containing (in mM): NaCl, 125; KCl, 2.5;  $\text{MgCl}_2$ , 1;  $\text{NaH}_2\text{PO}_4$ , 1.25;  $\text{NaHCO}_3$ , 26;  $\text{CaCl}_2$ , 1; glucose, 10; 7.4 pH, continuously bubbled with a 95%  $\text{O}_2$ /5%  $\text{CO}_2$  gas mixture at 25 °C. Slices were mounted onto the stage of a Zeiss axioplan upright microscope equipped with a 20 $\times$  objective (W-Achroplan, Zeiss; NA = 0.5) or 63 $\times$  (W-Plan-Apochromat, Zeiss; NA = 1) and a Zeiss AxioCam camera MRm (12 bit) connected through a software interface (Axiovision, Zeiss) to a Xenon fluorescent excitation source and a filter wheel. erGAP1 calcium probe was excited at 405/470 nm, and the emission fluorescence was acquired at 535 nm. All of the experiments were performed in ACSF at pH 7.4, in a custom-made chamber of 42- $\mu$ L volume under constant perfusion (3 mL/min).

1. Chamero P, et al. (2008) Nuclear calcium signaling by inositol trisphosphate in GH3 pituitary cells. *Cell Calcium* 43(2):205–214.

2. Kendall JM, Dormer RL, Campbell AK (1992) Targeting aequorin to the endoplasmic reticulum of living cells. *Biochem Biophys Res Commun* 189(2):1008–1016.

- Llopis J, McCaffery JM, Miyawaki A, Farquhar MG, Tsien RY (1998) Measurement of cytosolic, mitochondrial, and Golgi pH in single living cells with green fluorescent proteins. *Proc Natl Acad Sci USA* 95(12):6803–6808.
- Alonso MT, et al. (1998) Functional measurements of  $[Ca^{2+}]$  in the endoplasmic reticulum using a herpes virus to deliver targeted aequorin. *Cell Calcium* 24(2):87–96.
- Patton C, Thompson S, Epel D (2004) Some precautions in using chelators to buffer metals in biological solutions. *Cell Calcium* 35(5):427–431.

- Gilbert R, McNaughton P (1997) Enrichment of the fraction of nociceptive neurones in cultures of primary sensory neurones. *J Neurosci Methods* 71(2):191–198.
- Arce V, et al. (1999) Cardiotrophin-1 requires LIFRbeta to promote survival of mouse motoneurons purified by a novel technique. *J Neurosci Res* 55(1):119–126.
- Stoppini L, Buchs PA, Muller D (1991) A simple method for organotypic cultures of nervous tissue. *J Neurosci Methods* 37(2):173–182.

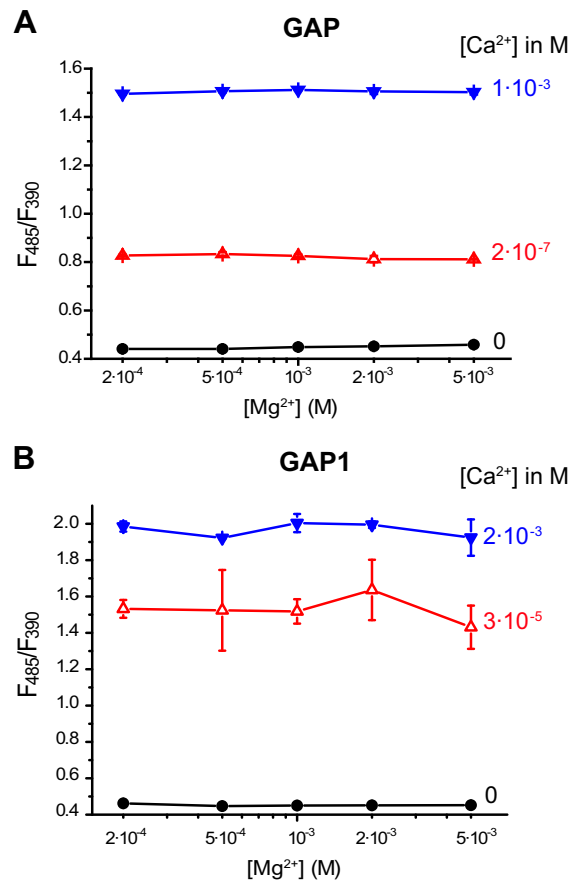

**Fig. S1.** GAP is not sensitive to  $Mg^{2+}$ . Data are given as ratio of fluorescence excited at 485 and 390 nm, measured in a fluorescence plate reader with 3  $\mu$ g protein/well of GAP (A) or GAP1 (B). All of the measurements were performed at 25 °C in medium containing 140 mM KCl and 20 mM MOPS–Tris, 7.2 pH.  $[Mg^{2+}]$  was adjusted to 0.2, 0.5, 1, 2, or 5 mM by adding  $MgCl_2$ .  $[Ca^{2+}] = 0$  was made by adding 0.2 mM EGTA;  $[Ca^{2+}] = 2 \cdot 10^{-7}$  M was made with a EGTA/ $Ca^{2+}$  buffer;  $[Ca^{2+}] = 1$  or  $2 \times 10^{-3}$  M solutions were made by adding  $CaCl_2$ ;  $[Ca^{2+}] = 3 \times 10^{-5}$  M was the estimated contaminant  $[Ca^{2+}]$  in a nominally  $Ca^{2+}$ -free solution. Each point represents the mean  $\pm$  SD of three measurements.

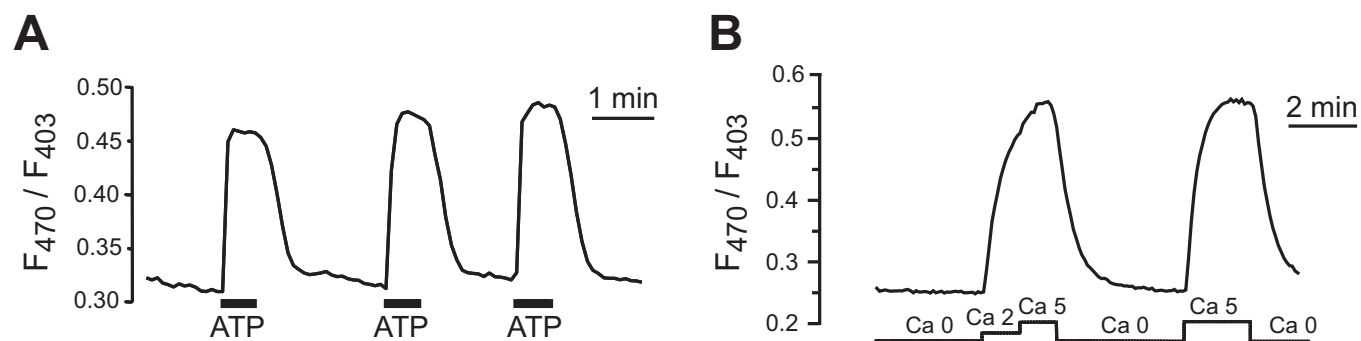

**Fig. 52.** Intracellular  $\text{Ca}^{2+}$  dynamics in GAP-transfected HEK 293 cells. (A) Cells were maximally stimulated with ATP + carbachol (100  $\mu\text{M}$  each; labeled as ATP). The trace is the average of nine cells. (B) Capacitative calcium entry [store-operated  $\text{Ca}^{2+}$  entry (SOCE)]. Cells were previously treated with thapsigargin (1  $\mu\text{M}$ ) in 0.1 mM EGTA for 10 min to empty the ER calcium stores. At the times shown, cells were perfused with external solutions containing either no  $\text{Ca}^{2+}$  (0.1 mM EGTA; Ca0), 2 mM (Ca2), or 5 mM  $\text{Ca}^{2+}$  (Ca5). The trace is the average of 27 cells.

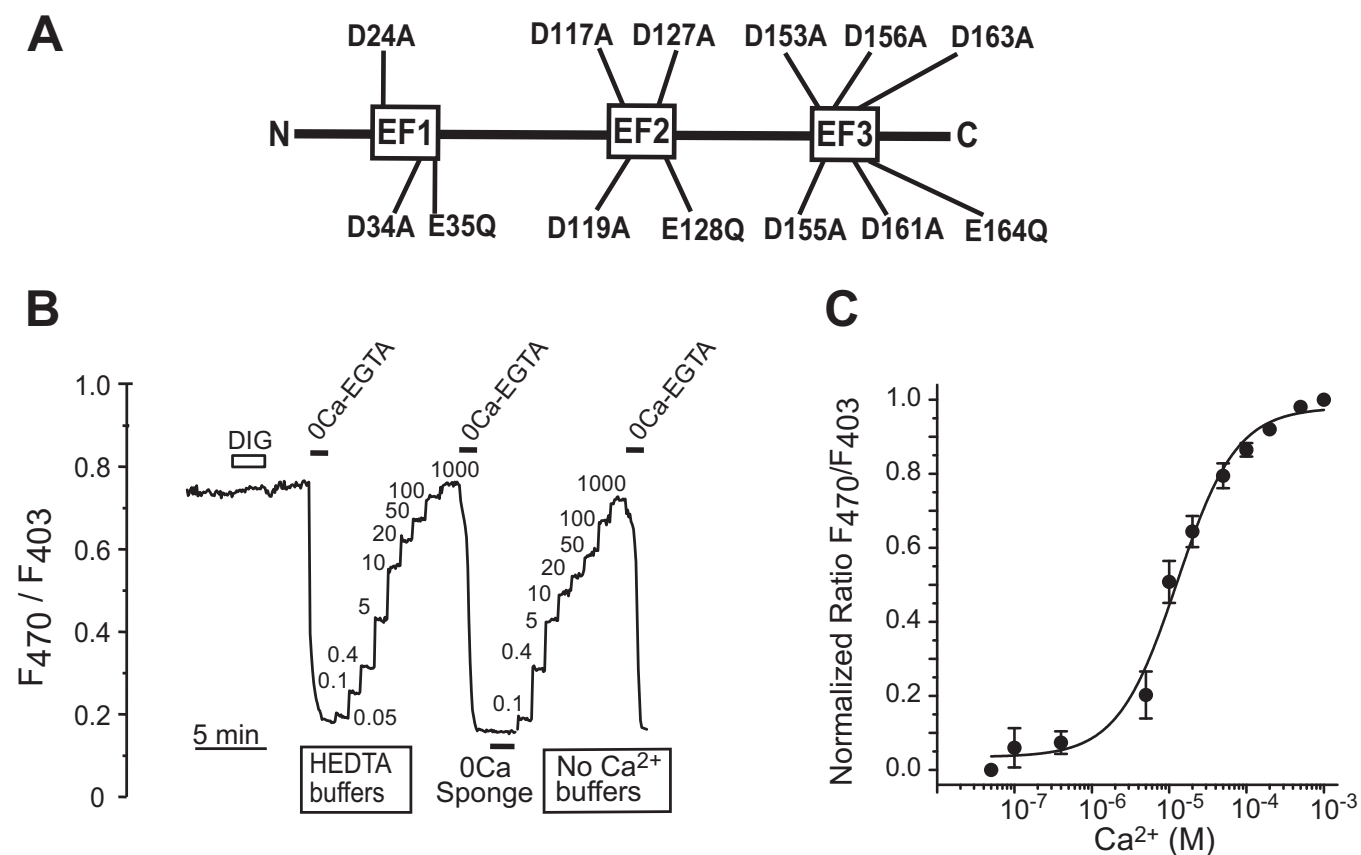

**Fig. 53.** Design and calibration of low-affinity GAP (GAP1). (A) Scheme of mutations in the EF hands within the aequorin moiety of GAP. The screening of the mutants was directly performed in transfected HeLa cells through a functional assay comparing the ratio decrease challenged by ATP plus carbachol (100  $\mu\text{M}$  each). In general, the substitutions in the EF1-hand site produced more dramatic effects than those in the other two sites, with either very noisy signals (D24A) or loss of fluorescence (D24A + D119A). By contrast, the substitutions in the EF3 hand led to milder effects. (B) Typical in situ  $\text{Ca}^{2+}$  calibration in erGAP1 stably expressing HeLa cells. The trace shown is the average of seven cells present in the same microscopic field. Cells were permeabilized with 60  $\mu\text{M}$  digitonin (DIG) and incubated with either HEDTA/calcium buffers or with no calcium buffers. Further details can be found in *SI Materials and Methods*. (C)  $\text{Ca}^{2+}$  calibration curve of erGAP1 at pH 7.2 obtained in several experiments performed as in B. Each data point represents the mean  $\pm$  SEM of three to nine measurements obtained in three to six different experiments. Data obtained with and without  $\text{Ca}^{2+}$  buffers were averaged together and expressed as Normalized Ratio ( $F_{470}/F_{403}$ ), computed in each experiment as:  $(R - R_{\min})/(R_{\max} - R_{\min})$ . The line represents the best-fitting curve using the equation  $R = (V_{\max} \times [\text{Ca}^{2+}]^n)/(K_m + [\text{Ca}^{2+}]^n)$  where  $V_{\max} = 1$  and  $K_m = 12 \times 10^{-6}$  M. When the Hill equation was used, a similar fitting of the curve was obtained ( $n = 0.86 \pm 0.24$ ).

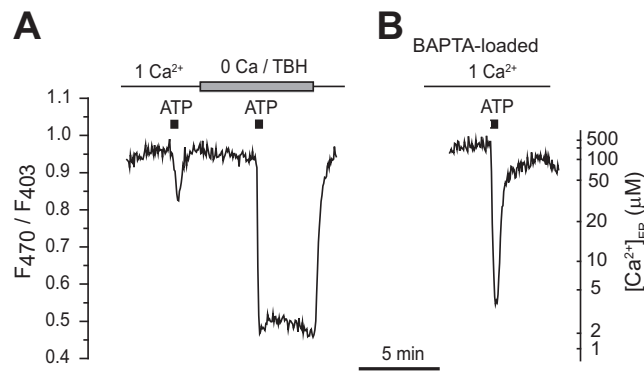

**Fig. S4.**  $[Ca^{2+}]_{ER}$  transients in erGAP1-expressing HeLa cells. (A) Representative  $[Ca^{2+}]_{ER}$  transients (average of 61 cells) in erGAP1-expressing HeLa cells stimulated with ATP + carbachol (100  $\mu$ M each; labeled as ATP) in 1 mM  $Ca^{2+}$  or in 0.5 mM EGTA plus 10  $\mu$ M tert-butyl-hydroquinone (labeled as 0 Ca/TBH). (B)  $[Ca^{2+}]_{ER}$  transient (average of 60 cells) in HeLa cells preincubated with bis-( $\alpha$ -aminophenoxy)-ethane-N,N,N',N'-tetraacetic acid acetoxymethyl ester (BAPTA/AM) (10  $\mu$ M) for 60 min.

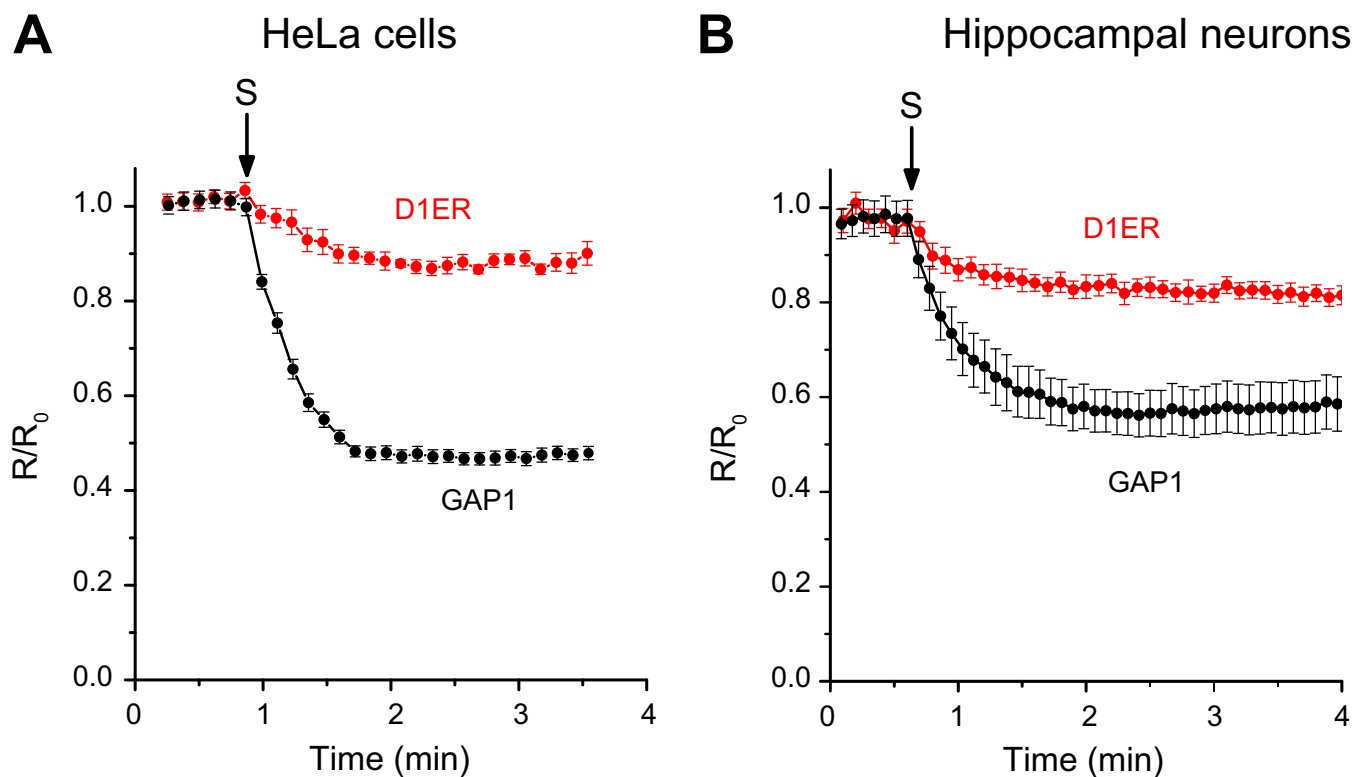

**Fig. S5.** Comparison between erGAP1 and D1ER. (A) Lipofectamine-transfected HeLa cells with pcDNA-D1ER (1  $\mu$ g/well) or stably erGAP1-expressing HeLa cells were stimulated with Histamine + ATP (100  $\mu$ M each), labeled as "S" (stimulus). Each point is the mean  $\pm$  SD ( $n = 7$  for D1ER;  $n = 28$  for erGAP1). Only the responding cells are included. (B) Dissociated hippocampal neurons were transfected with 1–2  $\mu$ g of D1ER or erGAP1, 2 d before measurements. Stimulus (S) was acetylcholine (1mM) + ATP (100  $\mu$ M) + TBH (10  $\mu$ M). Traces show the mean  $\pm$  SD of eight cells for each sensor.
